# Supplementary material
Source: MDPI journal article supplement (https://www.mdpi.com/2073-4395/9/8/466)
Supplement: s1 [file s1]

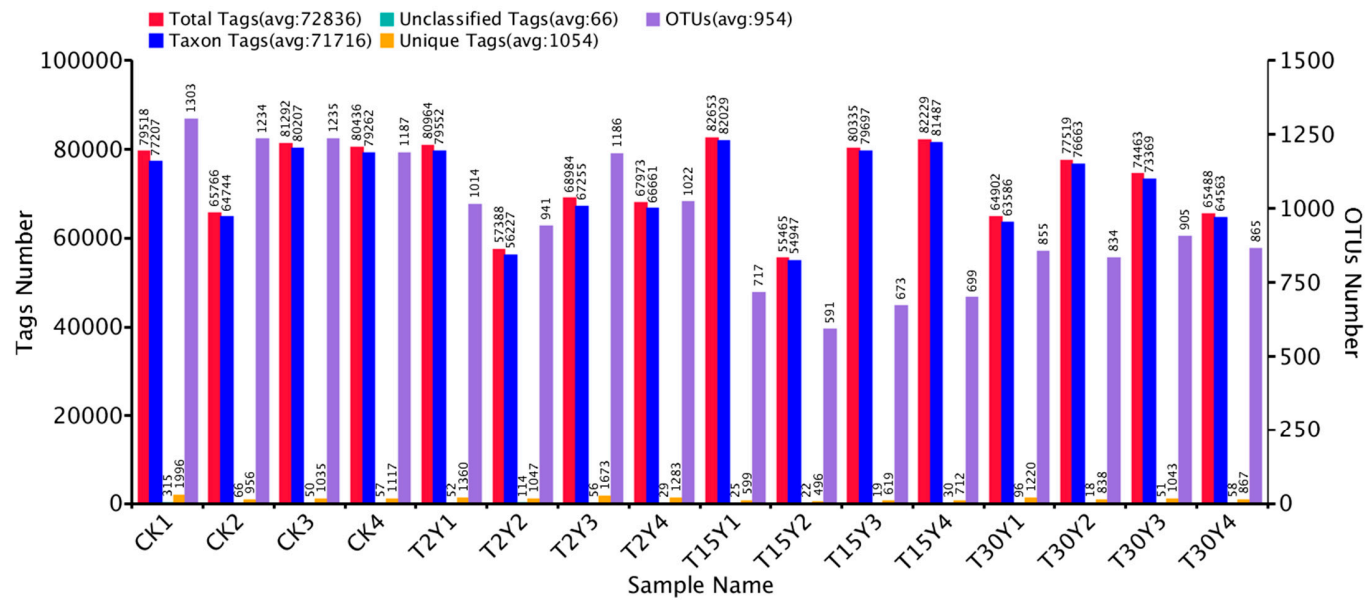

**Figure S1.** An operational classification unit (OTU) analysis of soil samples collected from the control and three-time series tea fields. The horizontal axis represents the sample name, the first vertical axis represents the tag number, and the second vertical axis represents the OTU number. “CK”, “T2Y”, “T15Y” and “T30Y” represent fields that have been continuously planted for 0, 2, 15 and 30 years, respectively.

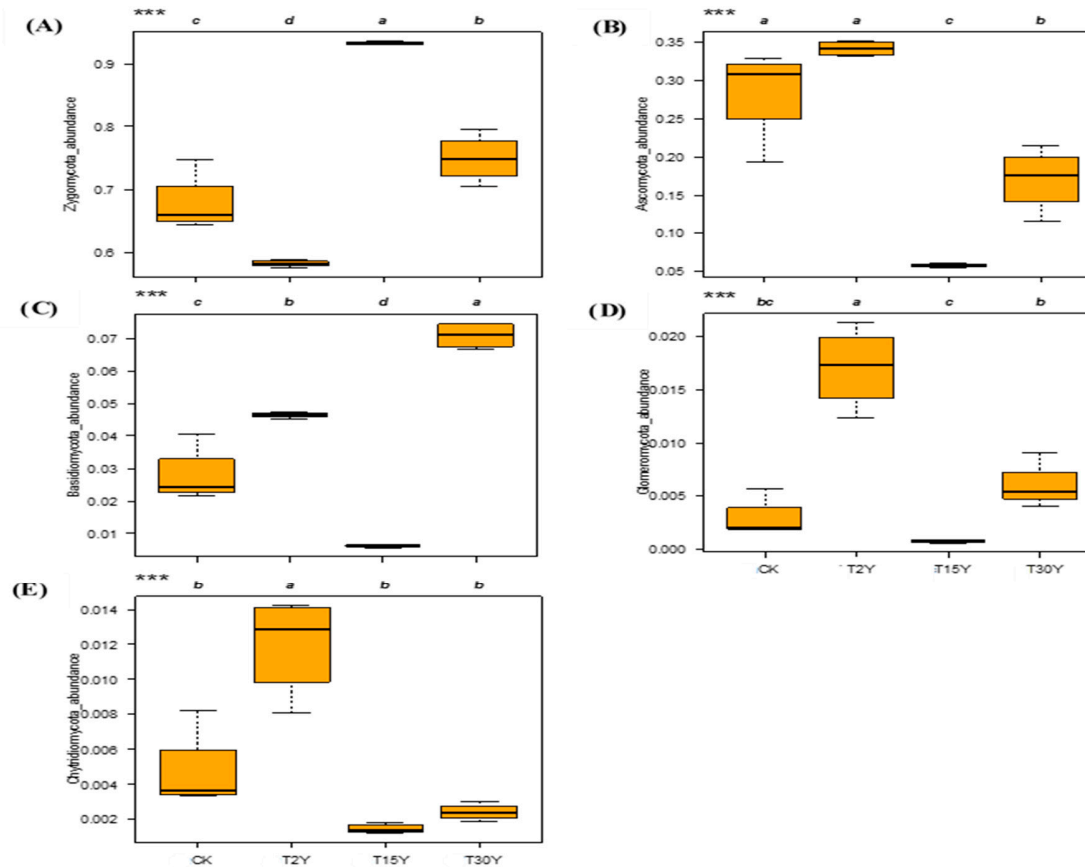

**Figure S2.** Box plots represent the relative abundance of fungal phyla in control and three series of tea fields. A: *Zygomycota*; B: *Ascomycota*; C: *Basidiomycota*; D: *Glomeromycota*; E: *Chytridiomycota*. Error bars with different lowercase letters indicate significant differences among treatments based on the LSD test ( $P < 0.05$ ). “CK”, “T2Y”, “T15Y” and “T30Y” represent fields consecutively planted for 0, 2, 15 and 30 years, respectively.

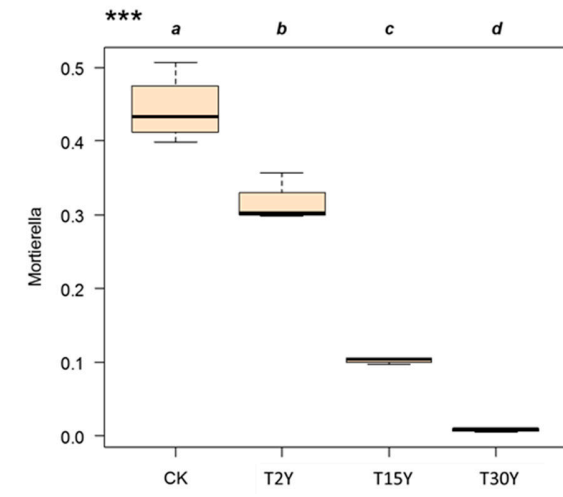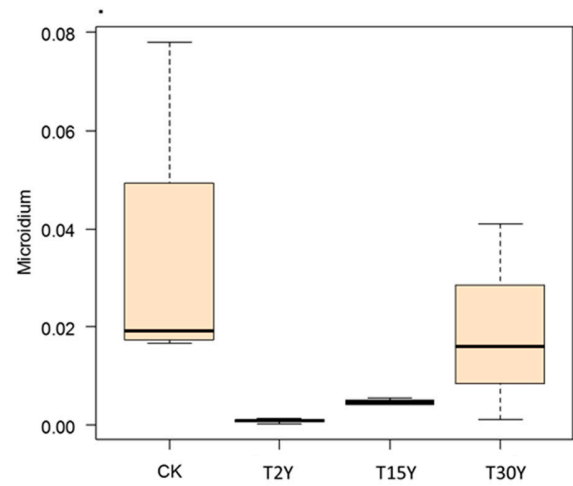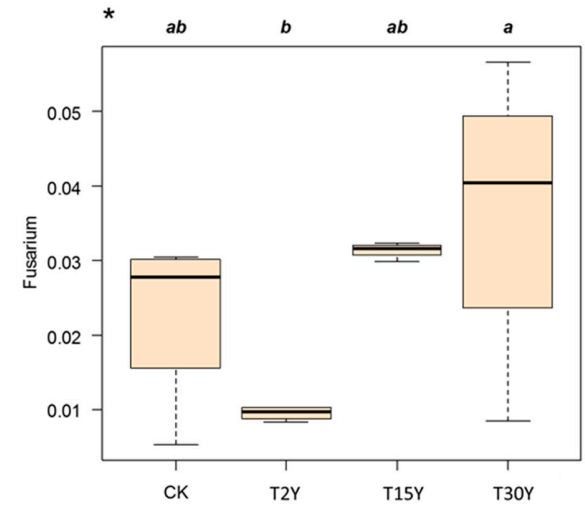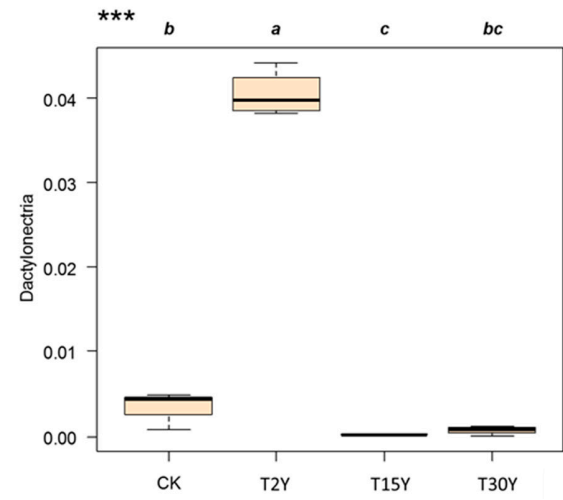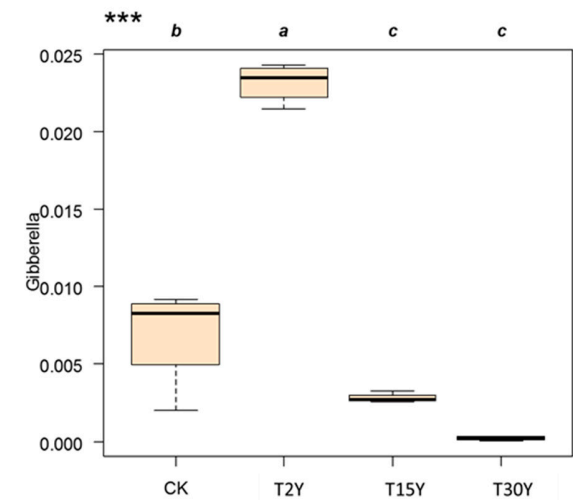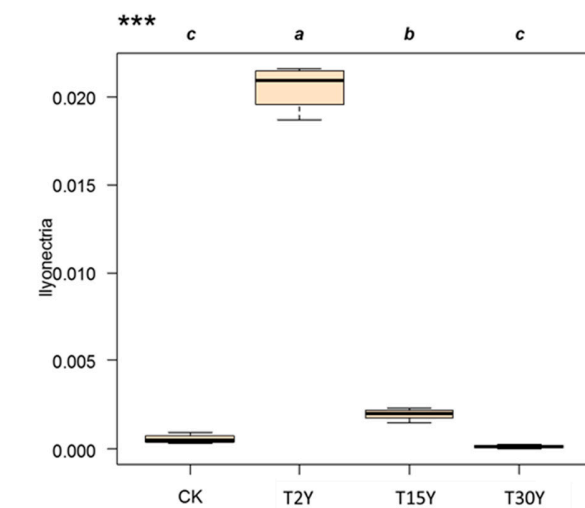

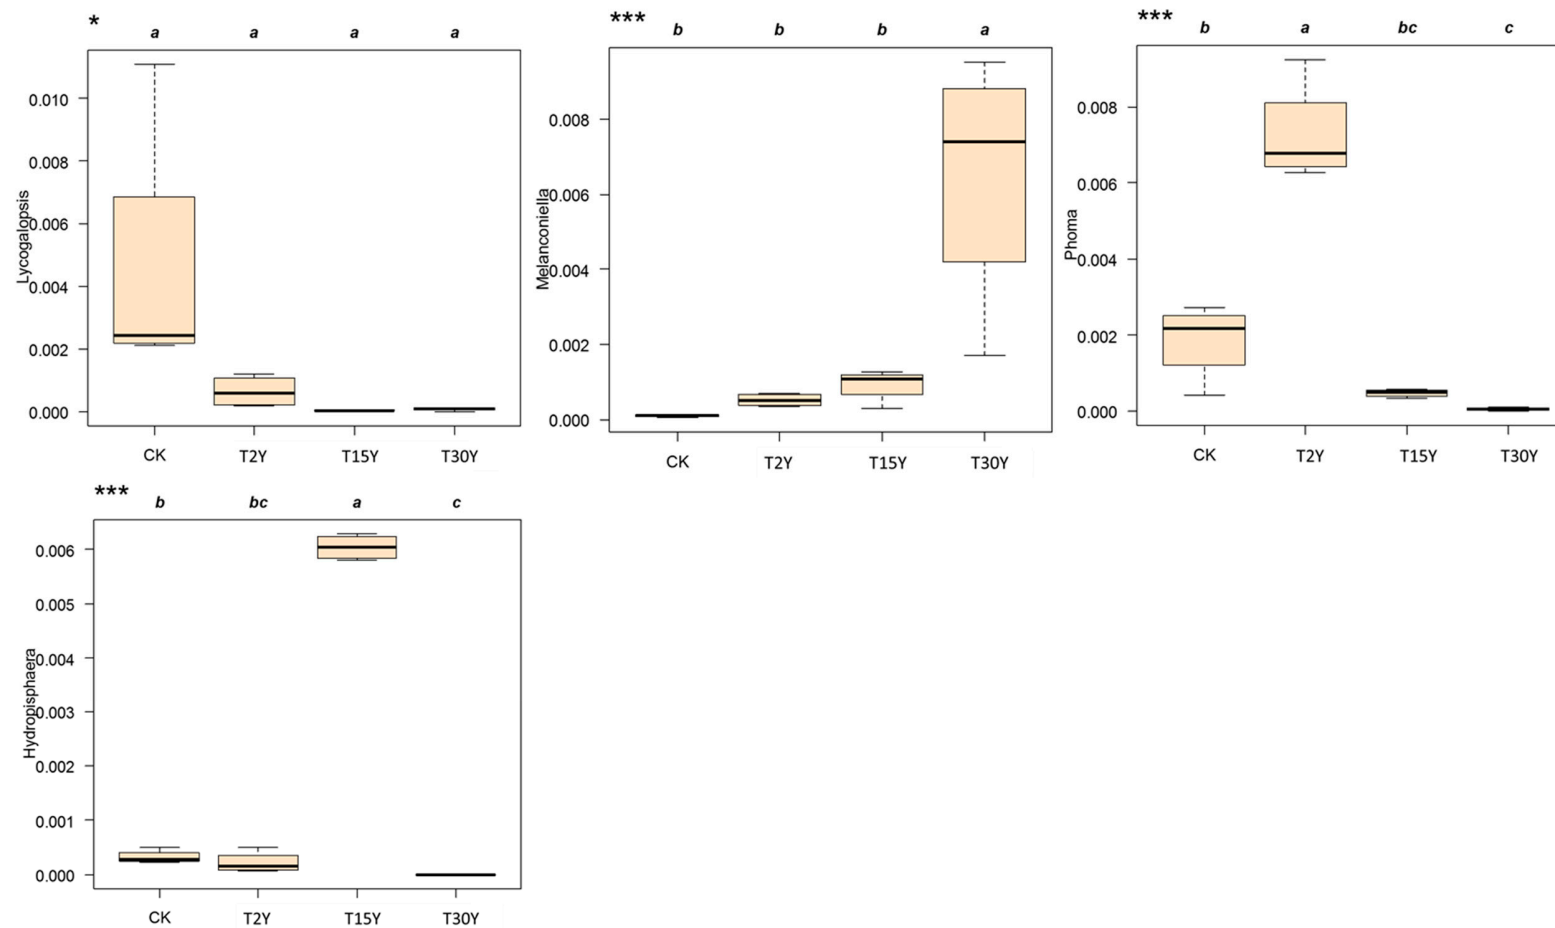

**Figure S3.** Box plots represent the relative abundance of top fungal generain control and three series of tea fields. Error bars with different lowercase letters indicate significant differences among treatments based on the LSD test ( $P < 0.05$ ,  $*P < 0.01$ ,  $*** P < 0.001$ ). “CK”, “T2Y”, “T15Y” and “T30Y” represent fields consecutively planted for 0, 2, 15 and 30 years, respectively.

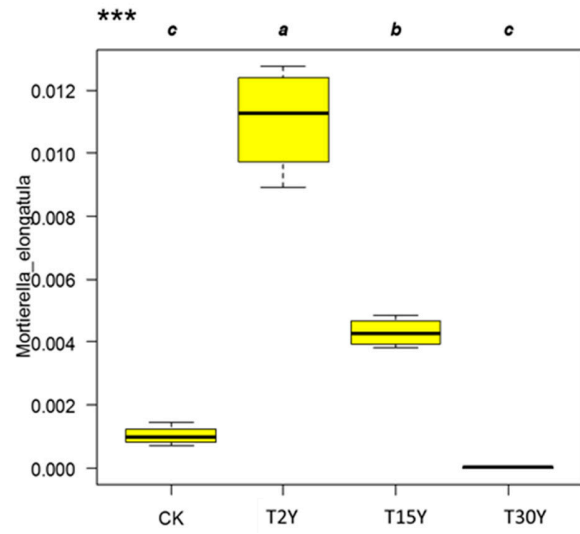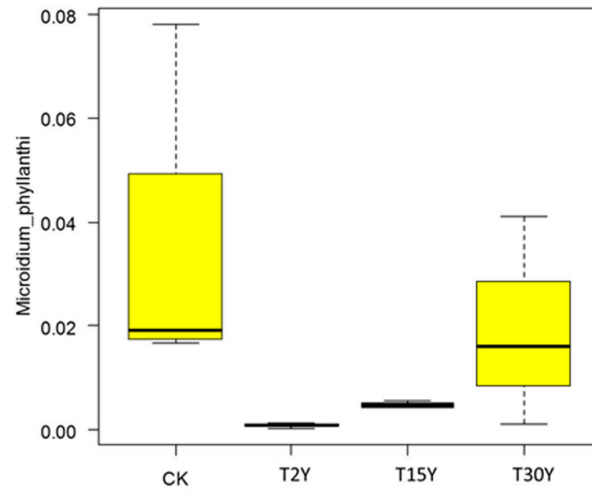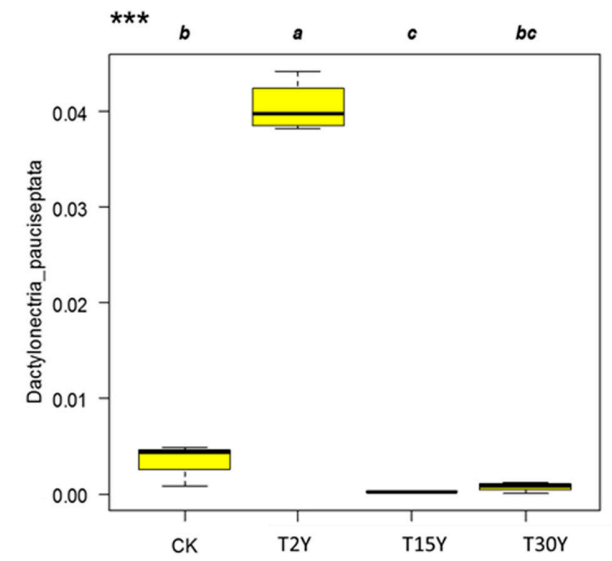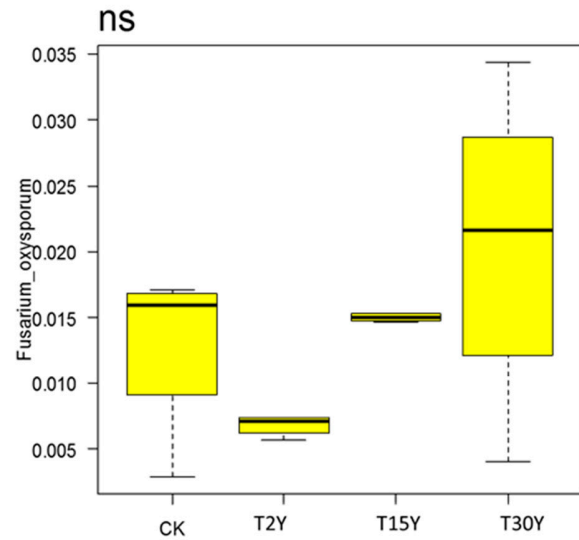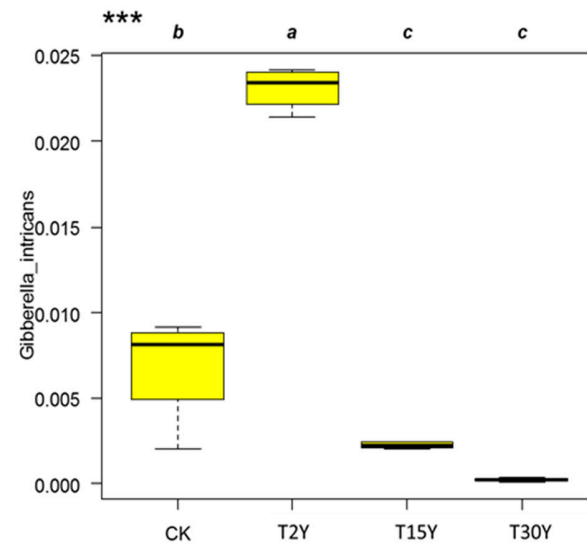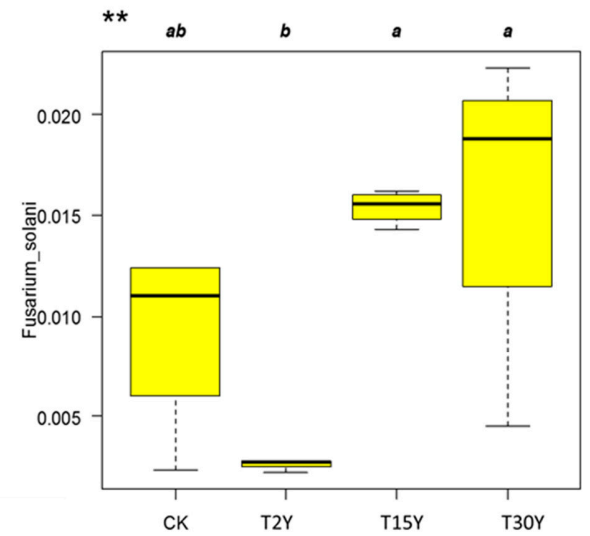

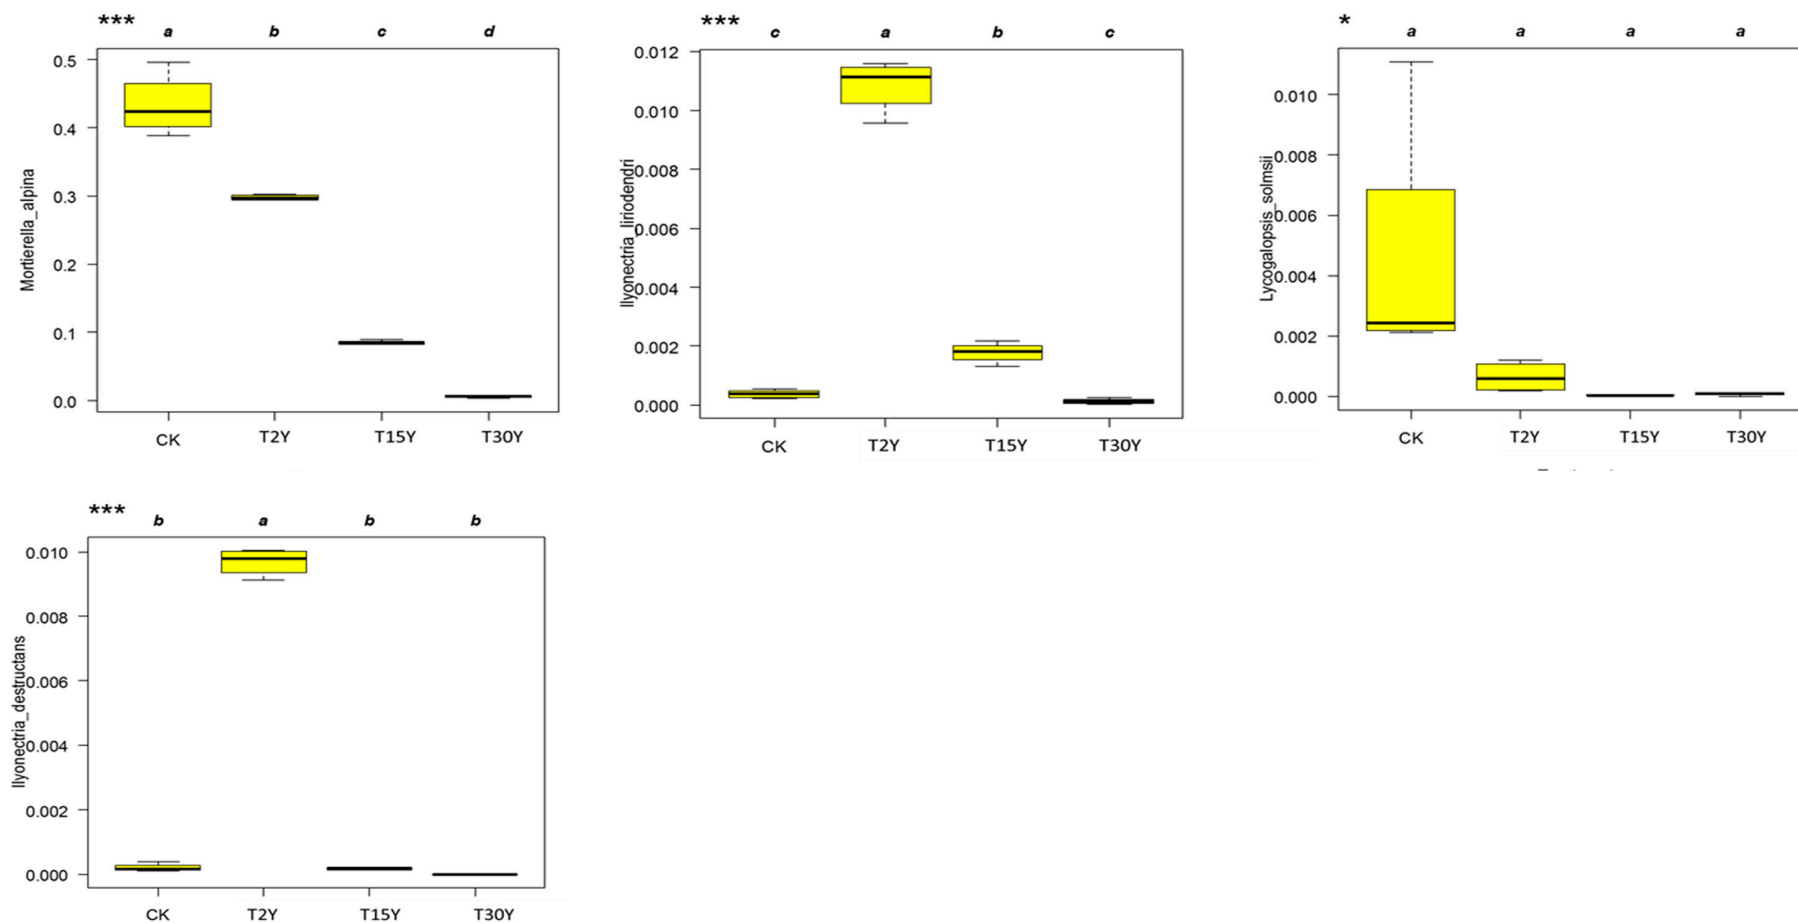

**Figure S4.** Box plots represent the relative abundance of top fungal species in the control and three series of tea fields. Error bars with different lowercase letters indicate significant differences among treatments based on the LSD test ( $P < 0.05$ ,  $*P < 0.01$ ,  $*** P < 0.001$ ).

“CK”, “T2Y”, “T15Y” and “T30Y” represent fields consecutively planted for 0, 2, 15 and 30 years, respectively.

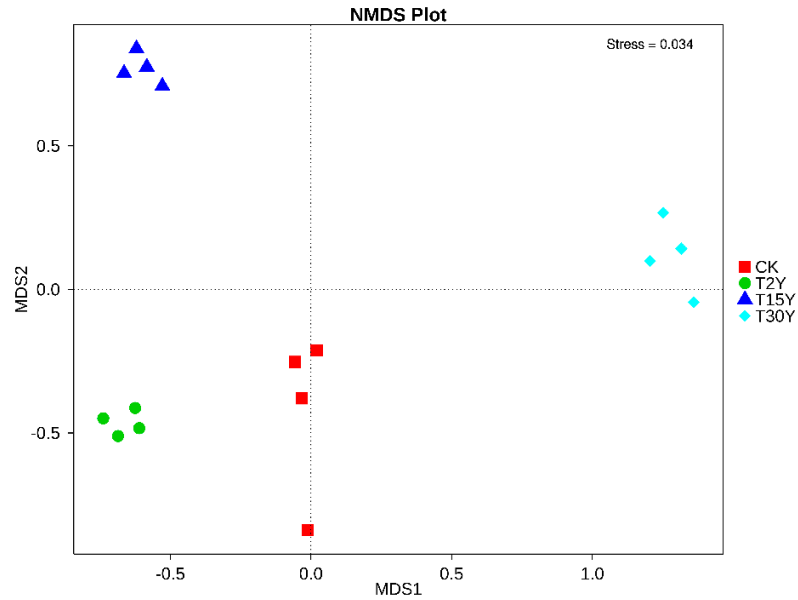

**Figure S5.** Non-metric multidimensional scaling graphs (NMDS) showing differences of fungal communities between the analyzed soil samples obtained from control and three-time series tea plantations. "CK," "T2Y", "T15Y" and "T30Y" represent fields consecutively planted for 0, 2, 15 and 30 years, respectively.

**Table S1.** Pearson's correlation between continuous cropping and abundant taxa of fungi (phyla, genera and species) in control and different age monoculture tea fields. \* Shows the significance level at  $P < 0.05$  and \*\* shows significance level at  $P < 0.01$ .

| Phylum                       | Time    | Genus                 | Time    | Species                            | Time    |
|------------------------------|---------|-----------------------|---------|------------------------------------|---------|
| <i>Zygomycota</i>            | 0.43    | <i>Mortierella</i>    | -0.96** | <i>Mortierella_alpina</i>          | -0.95** |
| <i>Ascomycota</i>            | -0.55   | <i>Microidium</i>     | 0.65*   | <i>Microidium_phyllanthi</i>       | 0.651*  |
| <i>Basidiomycota</i>         | 0.41    | <i>Fusarium</i>       | 0.70*   | <i>Dactylonectria_pauciseptata</i> | -0.83** |
| <i>Glomeromycota</i>         | -0.60*  | <i>Dactylonectria</i> | -0.83** | <i>Fusarium_oxysporum</i>          | 0.65*   |
| <i>Chytridiomycota</i>       | -0.76** | <i>Gibberella</i>     | -0.89** | <i>Gibberella_intricans</i>        | -0.88** |
| <i>Incertae_sedis_Fungi</i>  | 0.75**  | <i>Ilyonectria</i>    | -0.88** | <i>Fusarium_solani</i>             | 0.73**  |
| <i>Neocallimastigomycota</i> | -0.66*  | <i>Lycogalopsis</i>   | -0.59*  | <i>Mortierella_elongatula</i>      | -0.96** |
|                              |         | <i>Melanconiella</i>  | 0.77**  | <i>Ilyonectria_liriodendri</i>     | -0.90** |
|                              |         | <i>Phoma</i>          | -0.85** | <i>Lycogalopsis_solmsii</i>        | -0.59*  |
|                              |         | <i>Hydropisphaera</i> | -0.07   | <i>Ilyonectria_destructans</i>     | -0.85** |



**Table S2.** Species functions

| <b>Species</b>                         | <b>Effect on plants</b>                                                                                             | <b>Plants</b>                                | <b>References</b>           |
|----------------------------------------|---------------------------------------------------------------------------------------------------------------------|----------------------------------------------|-----------------------------|
| <i>Mortierella alpina</i>              | Suppress corm rot disease,<br>Improve morphological and<br>physiological traits of plants<br>Reduced the biotic and | Saffron crocus ( <i>Crocus<br/>sativus</i> ) | (Wani et al., 2017)         |
| <i>Fusarium oxysporum</i>              | Cause root rot and wilt                                                                                             | Tea                                          | (Huu Phong et al., 2016).   |
| <i>Fusarium solani</i>                 | Cause collar canker, dieback disease                                                                                | Tea                                          | (Sinniah et al., 2017).     |
| <i>Microdidium phyllanthi</i>          | Cause powdery mildew                                                                                                | Chamber bitter                               | (Tam et al., 2015).         |
| <i>Gibberella intricans</i>            | Trichothecene-producing plant pathogen                                                                              | wide range of plant<br>species               | (Salch and Beremand, 1993). |
| <i>Ilyonectria liriodendri</i>         | Cause black foot disease                                                                                            | Grape                                        | (Pathrose et al., 2014)     |
| <i>Dactylonectria<br/>pauciseptata</i> | Cause black foot disease<br>Cause Root Rot disease                                                                  | Grape<br>Plum                                | (Piperkova et al., 2017)    |

## References

- Huu Phong, N., Pongnak, W., Soyong, K., 2016. Antifungal activities of *Chaetomium* spp. Against fusarium wilt of tea. *Plant Prot. Sci.* 52, 10–17. <https://doi.org/10.17221/34/2015-PPS>
- Pathrose, B., Jones, E.E., Jaspers, M. V., Ridgway, H.J., 2014. High genotypic and virulence diversity in *Ilyonectria liriodendri* isolates associated with black foot disease in New Zealand vineyards. *Plant Pathol.* 63, 613–624. <https://doi.org/10.1111/ppa.12140>
- Piperkova, N., Cabral, A., Mohamedova, M., Milusheva, S., Oliveira, H., 2017. First Report of *Dactylonectria pauciseptata* Associated with Black Foot of Grapevine and Root Rot of Plum in Bulgaria. *Plant Dis.* 101, 2146.
- Salch, Y.P., Beremand, M.N., 1993. *Gibberella pulicaris* transformants: state of transforming DNA during asexual and sexual growth. *Curr. Genet.* 23, 343–350. <https://doi.org/10.1007/BF00310897>
- Sinniah, G.D., Munasinghe, C.E., Mahadevan, N., Jayasinghe, S.K., Kulatunga, D.C.M., 2017. Recent incidence of collar canker and dieback of tea (*Camellia sinensis*) caused by *Fusarium solani* species complex in Sri Lanka. *Australas. Plant Dis. Notes* 12. <https://doi.org/10.1007/s13314-017-0262-5>
- Tam, L.T.T., Hoai, H.T., Thao, L.P., Huong, N.T., Khue, N.M., 2015. First report of *Microidium phyllanthi* causing powdery mildew

on chamber bitter in Vietnam 5197.

Wani, Z.A., Kumar, A., Sultan, P., Bindu, K., Riyaz-Ul-Hassan, S., Ashraf, N., 2017. *Mortierella alpina* CS10E4, an oleaginous fungal endophyte of *Crocus sativus* L. enhances apocarotenoid biosynthesis and stress tolerance in the host plant. *Sci. Rep.* 7. <https://doi.org/10.1038/s41598-017-08974-z>
